# Supplementary material for: Study on New Dental Materials Containing Quinoxaline-Based Photoinitiators in Terms of Exothermicity of the Photopolymerization Process
Source: MDPI journal article supplement (doi:10.3390/ijms24032752), 2023-02-01
Supplement: s1 [file s1]

# Supporting information

## Study on new dental materials containing quinoxaline-based photoinitiators in terms of exothermicity of the photopolymerization process

Ilona Pyszka<sup>1</sup>, Łukasz Skowroński<sup>2</sup>, Beata Jędrzejewska<sup>3</sup>

<sup>1</sup> Faculty of Chemical Technology and Engineering, Bydgoszcz University of Science and Technology, 85-326 Bydgoszcz, Poland

<sup>2</sup> Institute of Mathematics and Physics, Bydgoszcz University of Science and Technology, Al. Prof. S. Kaliskiego St. 7, 85-796 Bydgoszcz, Poland

<sup>3</sup> Faculty of Chemical Technology and Engineering, Bydgoszcz University of Science and Technology, 85-326 Bydgoszcz, Poland

\* Correspondence: Ilona.Pyszka@pbs.edu.pl; Tel.: +48-52-374-9039

| Table of contents                                                                                                          | Page  |
|----------------------------------------------------------------------------------------------------------------------------|-------|
| Temperature changes during irradiation – Figure S1 .....                                                                   | S2    |
| Effect of dental filler on temperature during polymerization – Figure S2 .....                                             | S2    |
| The maximum temperature increase during irradiation – Figure S3 .....                                                      | S3    |
| Initial rate of photoinitiated polymerization and maximum temperature rise – Table S1.....                                 | S3    |
| Initial rate of photoinitiated polymerization and maximum temperature rise for composition with filler – Table S2 –S4..... | S3-S4 |
| Compressive strength for the tested dental fillings – Table S5 .....                                                       | S4    |

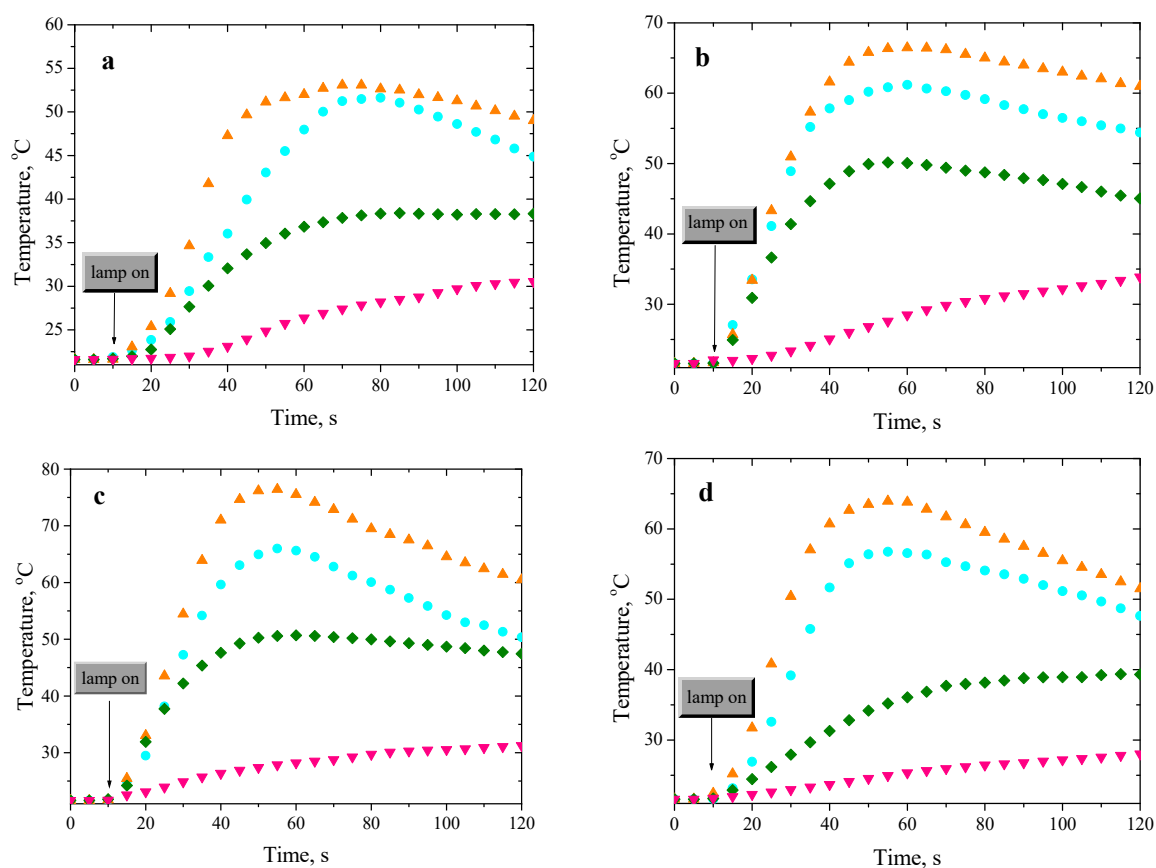

**Figure S1.** Temperature changes during irradiation of the tested monomer composites. Initiating system: photoinitiator: **a**-Ph1, **b**-Ph2, **c**-Ph3, **d**-Ph4; co-initiator: ▲-NAA, ●-PhTAA, ◆-EDMAB, ▼-PAA ( $c = 0.1$  M).  $I = 15$  mW/cm<sup>2</sup>. Trimethylolpropane triacrylate (TMPTA) was used as monomer. Abbrev.: dibenzo[a,c]phenazine (Ph1), benzo[a]phenazine (Ph2), 11*H*-indeno[1,2-*b*]quinoxalin-11-one (Ph3), 6*H*-indolo[2,3-*b*]quinoxaline (Ph4), camphorquinone (CQ), (phenylthio)acetic acid (PhTAA), 1-naphthoxyacetic acid (NAA), phenoxyacetic acid (PhAA) and ethyl 4-dimethylaminobenzoate (EDMAB) as co-initiators

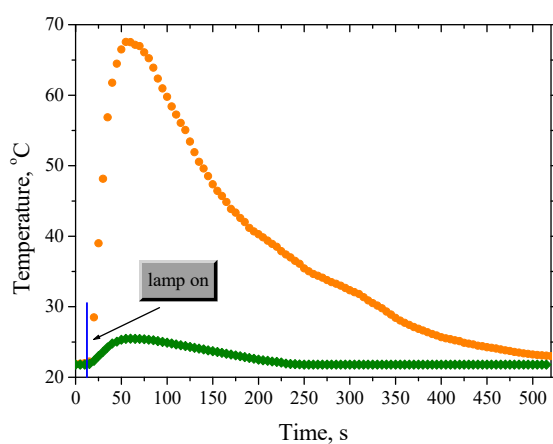

**Figure S2.** Kinetic curves showing the effect of dental filler on temperature during polymerization initiated by Ph2 in the presence of 1-naphthoxyacetic acid (NAA;  $c = 0.1$  M). ● - lack of filler, ◆ - presence of filler (DF1). Trimethylolpropane triacrylate (TMPTA) was used as monomer. The light intensity of the dental lamp was 15 mW/cm<sup>2</sup>.

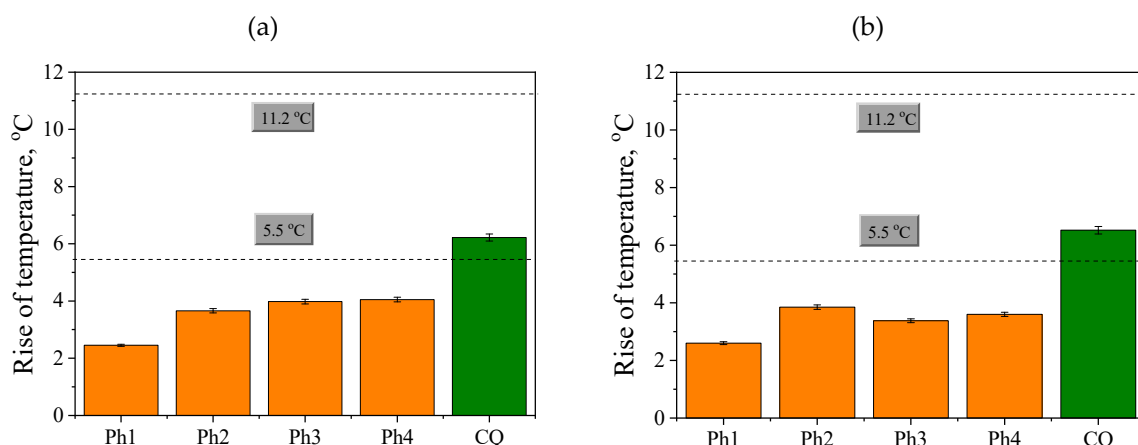

**Figure S3.** The mean values with standard deviation of the maximum temperature increase during irradiation of the tested polymeric materials. The photoinitiating systems contain different light absorbers (photoinitiators) marked in Figure (Ph1-4 and CQ) and the same co-initiator PhTAA. As the dental filler DF1 (a) and DF2 (b) were used, respectively. The light intensity of the dental lamp was 15 mW/cm<sup>2</sup>.

**Table S1.** Initial rate of photoinitiated polymerization ( $R_p$ ) and maximum temperature ( $T_{max}$ ) rise for the tested composites included dibenzo[a,c]phenazine (Ph1), benzo[a]phenazine (Ph2), 11*H*-indeno[1,2-*b*]quinoxalin-11-one (Ph3), 6*H*-indolo[2,3-*b*]quinoxaline (Ph4) and camphorquinone (CQ) as photoinitiators and (phenylthio)acetic acid (PhTAA), 1-naphthoxyacetic acid (NAA), phenoxyacetic acid (PhAA) and ethyl 4-dimethylaminobenzoate (EDMAB) as co-initiators. Trimethylolpropane triacrylate (TMPTA) was used as monomer.

| Dye | $R_p$ [ $\mu\text{mol s}^{-1}$ ] |           |           |          | $T_{max}$ [°C] |            |            |            |
|-----|----------------------------------|-----------|-----------|----------|----------------|------------|------------|------------|
|     | PhTAA                            | NAA       | PhAA      | EDMAB    | PhTAA          | NAA        | PhAA       | EDMAB      |
| Ph1 | 15.5±0.10                        | 29.6±0.18 | 11.7±0.12 | 4.2±0.15 | 51.53±0.94     | 61.19±0.98 | 66.01±1.08 | 56.75±0.95 |
| Ph2 | 36.1±0.21                        | 41.2±0.21 | 24.6±0.10 | 1.8±0.12 | 53.08±1.00     | 66.45±1.05 | 76.44±1.12 | 63.95±1.10 |
| Ph3 | 37.6±0.21                        | 47.8±0.10 | 31.8±0.10 | 3.9±0.14 | 38.40±1.02     | 50.14±1.09 | 50.71±0.99 | 39.50±1.15 |
| Ph4 | 30.0±0.20                        | 42.9±0.12 | 23.2±0.14 | 1.9±0.11 | 31.30±1.10     | 34.59±1.12 | 31.29±0.98 | 29.80±1.20 |
| CQ  | 44.4±0.10                        | 56.5±0.11 | 37.2±0.12 | 4.1±0.10 | 81.88±0.99     | 85.32±1.05 | 70.51±1.00 | 34.60±1.15 |

**Table S2.** Initial rate of photoinitiated polymerization ( $R_p$ ) and maximum temperature ( $T_{max}$ ) rise for the tested composites included DF1 filler

| Dye | $R_p$ [ $\mu\text{mol s}^{-1}$ ] |          |          |          | $T_{max}$ [°C] |            |            |            |
|-----|----------------------------------|----------|----------|----------|----------------|------------|------------|------------|
|     | PhTAA                            | NAA      | PhAA     | EDMAB    | PhTAA          | NAA        | PhAA       | EDMAB      |
| Ph1 | 1.2±0.10                         | 2.1±0.11 | 0.9±0.10 | 4.5±0.11 | 24.05±1.02     | 28.32±0.97 | 23.01±1.12 | 25.02±1.25 |
| Ph2 | 2.7±0.11                         | 3.0±0.12 | 1.9±0.12 | 2.3±0.11 | 25.26±1.20     | 30.05±1.20 | 24.97±1.18 | 26.76±1.22 |
| Ph3 | 2.9±0.10                         | 3.5±0.10 | 2.5±0.11 | 4.4±0.12 | 24.68±1.15     | 27.89±1.22 | 23.00±1.20 | 25.34±1.15 |
| Ph4 | 2.3±0.10                         | 3.2±0.11 | 1.8±0.10 | 2.4±0.10 | 25.00±0.98     | 28.88±1.08 | 24.04±1.28 | 26.76±0.99 |
| CQ  | 3.2±0.10                         | 3.1±0.10 | 2.6±0.10 | 4.8±0.10 | 27.82±0.99     | 32.51±1.05 | 26.55±1.36 | 28.22±0.98 |

**Table S3.** Initial rate of photoinitiated polymerization ( $R_p$ ) and maximum temperature ( $T_{max}$ ) rise for the tested composites included DF2 filler

| Dye | $R_p$ [ $\mu\text{mol s}^{-1}$ ] |          |          |          | $T_{max}$ [°C] |            |            |            |
|-----|----------------------------------|----------|----------|----------|----------------|------------|------------|------------|
|     | PhTAA                            | NAA      | PhAA     | EDMAB    | PhTAA          | NAA        | PhAA       | EDMAB      |
| Ph1 | 0.8±0.10                         | 1.6±0.11 | 0.5±0.10 | 3.2±0.11 | 24.20±0.99     | 28.78±1.25 | 23.98±1.24 | 26.92±0.99 |
| Ph2 | 2.1±0.11                         | 2.4±0.10 | 1.4±0.11 | 1.4±0.10 | 25.45±1.20     | 31.09±1.28 | 25.76±1.22 | 27.88±1.16 |
| Ph3 | 2.1±0.12                         | 2.8±0.10 | 2.0±0.12 | 3.5±0.11 | 24.98±1.32     | 29.89±1.16 | 24.20±1.12 | 26.31±1.14 |
| Ph4 | 1.7±0.10                         | 2.1±0.12 | 1.2±0.10 | 1.6±0.10 | 25.20±1.14     | 30.58±1.14 | 25.66±1.10 | 27.54±1.16 |
| CQ  | 2.5±0.11                         | 2.2±0.13 | 2.1±0.10 | 3.8±0.13 | 28.12±1.16     | 31.57±1.22 | 27.49±1.14 | 29.23±1.24 |

**Table S4.** Initial rate of photoinitiated polymerization ( $R_p$ ) and maximum temperature ( $T_{max}$ ) rise for the tested composites included DF3 filler

| Dye        | $R_p$ [ $\mu\text{mol s}^{-1}$ ] |                |                |                | $T_{max}$ [ $^{\circ}\text{C}$ ] |                  |                  |                  |
|------------|----------------------------------|----------------|----------------|----------------|----------------------------------|------------------|------------------|------------------|
|            | PhTAA                            | NAA            | PhAA           | EDMAB          | PhTAA                            | NAA              | PhAA             | EDMAB            |
| <b>Ph1</b> | 1.0 $\pm$ 0.10                   | 1.9 $\pm$ 0.10 | 0.7 $\pm$ 0.11 | 4.2 $\pm$ 0.11 | 24.50 $\pm$ 1.05                 | 29.99 $\pm$ 1.12 | 24.51 $\pm$ 1.35 | 27.12 $\pm$ 1.12 |
| <b>Ph2</b> | 2.4 $\pm$ 0.11                   | 2.7 $\pm$ 0.10 | 1.6 $\pm$ 0.12 | 1.8 $\pm$ 0.14 | 25.81 $\pm$ 0.98                 | 32.45 $\pm$ 1.15 | 25.91 $\pm$ 1.25 | 28.86 $\pm$ 1.12 |
| <b>Ph3</b> | 2.5 $\pm$ 0.12                   | 3.1 $\pm$ 0.11 | 2.1 $\pm$ 0.11 | 3.9 $\pm$ 0.14 | 25.58 $\pm$ 0.99                 | 29.69 $\pm$ 1.16 | 24.09 $\pm$ 1.20 | 26.38 $\pm$ 1.14 |
| <b>Ph4</b> | 2.0 $\pm$ 0.10                   | 2.8 $\pm$ 0.10 | 1.5 $\pm$ 0.15 | 1.9 $\pm$ 0.10 | 25.65 $\pm$ 0.98                 | 29.89 $\pm$ 1.16 | 26.09 $\pm$ 1.14 | 27.36 $\pm$ 1.21 |
| <b>CQ</b>  | 2.9 $\pm$ 0.10                   | 2.7 $\pm$ 0.11 | 2.4 $\pm$ 0.14 | 4.1 $\pm$ 0.11 | 28.81 $\pm$ 1.18                 | 33.41 $\pm$ 1.14 | 27.55 $\pm$ 1.10 | 29.42 $\pm$ 1.08 |

**Table S5.** Compressive strength ( $R$ , MPa) for the tested dental fillings obtained from photo-cured compositions containing DF1 filler.

| Dye | $R$ [MPa] |      |      |       |
|-----|-----------|------|------|-------|
|     | PhTAA     | NAA  | PhAA | EDMAB |
| Ph1 | 1.75      | 1.90 | 1.20 | 1.80  |
| Ph2 | 1.80      | 1.75 | 1.40 | 1.90  |
| Ph3 | 1.75      | 1.80 | 1.25 | 1.75  |
| Ph4 | 1.87      | 1.90 | 1.55 | 1.78  |
| CQ  | 1.50      | 1.60 | 1.10 | 1.70  |
